1 Effects of mesotocin on social bonding in pinyon jays

2 Juan F. Duque<sup>1,2</sup>, Tanner Rasmussen<sup>1</sup>, Anna Rodriguez<sup>1</sup>, & Jeffrey R. Stevens<sup>1</sup>

3 <sup>1</sup> University of Nebraska-Lincoln

4 <sup>2</sup> Arcadia University

5 Author Note

6 Juan F. Duque, Tanner Rasmussen, Anna Rodriguez, Jeffrey R. Stevens, Department  
7 of Psychology, Center for Brain, Biology & Behavior, University of Nebraska, Lincoln,  
8 Lincoln, NE, USA 68588

9 Correspondence concerning this article should be addressed to Juan F. Duque, 450  
10 South Easton Road, 125 Boyer Hall, Arcadia University, Glenside, PA 19038. E-mail:  
11 [jfduque89@gmail.com](mailto:jfduque89@gmail.com)

Abstract

12

13 The neuropeptide oxytocin influences mammalian social bonding by facilitating the building  
14 and maintenance of parental, sexual, and same-sex social relationships. However, we do not  
15 know whether the function of the avian homologue mesotocin is evolutionarily conserved  
16 across birds. While it does influence avian prosocial behavior, mesotocin's role in avian social  
17 bonding remains unclear. Here, we investigated whether mesotocin regulates the formation  
18 and maintenance of same-sex social bonding in pinyon jays (*Gymnorhinus cyanocephalus*), a  
19 member of the crow family. We formed squads of four individually housed birds. In the first,  
20 'pair-formation' phase of the experiment, we repeatedly placed pairs of birds from within the  
21 squad together in a cage for short periods of time. Prior to entering the cage, we intranasally  
22 administered one of three hormone solutions to both members of the pair: mesotocin,  
23 oxytocin antagonist, or saline. Pairs received repeated sessions with administration of the  
24 same hormone. In the second, 'pair-maintenance' phase of the experiment, all four members  
25 of the squad were placed together in a large cage, and no hormones were administered. For  
26 both phases, we measured the physical proximity between pairs as our proxy for social  
27 bonding. We found that, compared to saline, administering mesotocin or oxytocin antagonist  
28 did not result in different proximities in either the pair-formation or pair-maintenance phase  
29 of the experiment. Therefore, at the dosages and time frames used here, exogenously  
30 introduced mesotocin did not influence same-sex social bond formation or maintenance. Like  
31 oxytocin in mammals, mesotocin regulates avian prosocial behavior; however, unlike  
32 oxytocin, we do not have evidence that mesotocin regulates social bonds in birds.

33

*Keywords:* corvid, mesotocin, oxytocin, pinyon jay, social bond

34 Effects of mesotocin on social bonding in pinyon jays

35 **Introduction**

36 A group of young male pinyon jays fly from pine tree to pine tree consuming seeds as  
37 they go. Two of the birds are inseparable, never straying more than a few feet from each  
38 other. Other jays come and go from the group, but this dyad stays together for the season,  
39 even though they are not related. This dyad shares a strong bond, and each member of the  
40 dyad has weaker bonds with other individuals. Similar patterns occur in the interactions  
41 when humans engage in social events. Although everyone is together, the sociality of  
42 individuals varies. Some congregate in tight groups “catching up”, while others remain  
43 separate from groups, sticking near the food bar or off to the side of the room.

44 Having strong social connections is beneficial to survival and reproduction (Silk, 2007;  
45 Clutton-Brock, 2016). For example, maternal behavior depends on the bond created after  
46 birth and during nursing in mammals, particularly in species that give birth to a single  
47 offspring at a time rather than a litter (Broad, Curley, & Keverne, 2006). Notably, the  
48 maternal behaviors—nursing, grooming, and infant retrieval—are essential to the health and  
49 survival of the offspring and thus reproductive success of the mother. Further, strong  
50 female-female bonds often lead to maternal behavior by females other than the offspring’s  
51 mother, which are critical to the survival and reproduction of the offspring (Hrdy, 1999;  
52 Broad, Curley, & Keverne, 2006). Long-term study of savannah baboons has shown sociality  
53 and individual bonds between females to lead longer female longevity and increased infant  
54 survival (Silk, Alberts, & Altmann, 2003; Silk, Beehner, Bergman, Crockford, Engh,  
55 Moscovice, Wittig, Seyfarth, & Cheney, 2010). In feral horses, these female-female bonds  
56 benefit both the survival of individual foals and overall fecundity of the mares involved. In  
57 fact, these bonds seem to limit harmful behavior in the males, such as aggression toward  
58 mares, harassment, and infanticide (Cameron, Setsaas, & Linklater, 2009).

59 Social bonds provide obvious adaptive benefits, but what physiological mechanisms  
60 underlie these bonds? The neuropeptide hormone oxytocin (OT) plays a key role in a range  
61 of social behaviors. For example, sharing food increases levels of oxytocin circulating in the  
62 body of chimpanzees (Wittig, Crockford, Deschner, Langergraber, Ziegler, & Zuberbühler,  
63 2014), and administering oxytocin to dogs increases gazing behavior at owners (Nagasawa,  
64 Mitsui, En, Ohtani, Ohta, Sakuma, Onaka, Mogi, & Kikusui, 2015). Further, oxytocin  
65 regulates the development of pair bonds and mother-offspring bonds. In rats, maternal  
66 behaviors, such as nursing and infant retrieval, act as a positive feedback for both mother  
67 and pups, resulting in increasing levels of oxytocin that strengthen their attachment  
68 (Nagasawa, Okabe, Mogi, & Kikusui, 2012). Administering oxytocin can induce similar  
69 maternal behavior in sheep that do not have offspring (Costa, Guevara-Guzman, Ohkura,  
70 Goode, & Kendrick, 1996). In the prairie vole, a primarily monogamous species,  
71 administration of oxytocin to females can establish mating pair and maternal bonds, whereas  
72 administration of an oxytocin antagonist can hinder such bonds (Insel, Winslow, Wang, &  
73 Young, 1998). In female marmosets, oxytocin administration induces greater preference for  
74 the male they were previously paired with and seems to make individuals in established  
75 bonded-pairings less likely to form social bonds with opposite sex strangers (Cavanaugh,  
76 Mustoe, Taylor, & French, 2014).

77 Oxytocin also plays a key role in social bonds among unrelated individuals outside of  
78 the pair bond. In humans, oxytocin levels can affect trust between non-kin humans (Kosfeld,  
79 Heinrichs, Zak, Fischbacher, & Fehr, 2005, Baumgartner, Heinrichs, Vonlanthen, Fischbacher,  
80 and Fehr (2008)), though its effects depend on context (Bartz, Zaki, Bolger, & Ochsner,  
81 2011; Nave, Camerer, & McCullough, 2015). In chimpanzees, oxytocin levels increase when  
82 socially bonded partners groom but not when non-bonded partners groom (Crockford,  
83 Wittig, Langergraber, Ziegler, Zuberbühler, & Deschner, 2013). Oxytocin plays a  
84 complicated role in capuchin monkey social proximity, with oxytocin administration actually  
85 increasing social distance rather than decreasing it (Brosnan, Talbot, Essler, Leverett,

86 Flemming, Dougall, Heyler, & Zak, 2015; Benítez, Sosnowski, Tomeo, & Brosnan, 2018). So,  
87 it remains unclear how oxytocin regulates these bonds. Specifically, we do not understand  
88 how oxytocin underlies the initial formation of the social bond itself and, then, once a bond  
89 is established, the role that it plays in maintaining that social bond.

90 Here, we sought to assess the role of oxytocin in social bond formation and  
91 maintenance. We investigated this in pinyon jays (*Gymnorhinus cyanocephalus*), a highly  
92 social North American corvid. Like many social primates, pinyon jays have a  
93 fission-fusion-like dynamic social system in which individuals are typically part of a small,  
94 tight-knit sub-group of 5-20 individuals, but sub-groups often congregate, forming large  
95 flocks of up to 500 individuals (Marzluff & Balda, 1992). Individual pinyon jays engage in  
96 prosocial behavior, particularly through the sharing of food. Though food sharing between  
97 same-sex pairs of birds is not dependent on reciprocity, more dominant birds may be more  
98 likely to share with subordinate ones, which suggests sharers may be receiving social benefits  
99 (Duque & Stevens, 2016). Moreover, administering mesotocin (MT), the avian homologue to  
100 oxytocin, increases the likelihood that pinyon jays will voluntarily be generous to others. If  
101 given an option between providing food for only itself or itself and another individual  
102 (prosocial choice), mesotocin increases the preference for the prosocial action (Duque,  
103 Leichner, Ahmann, & Stevens, 2018). Thus, the long-lived and highly social nature of pinyon  
104 jays and evidence of mesotocin influencing their prosociality make them ideal candidates to  
105 study how social bonds form.

106 Both oxytocin and mesotocin are nine amino acid peptides but mesotocin has a minor  
107 amino acid substitution from leucine to iso-leucine in position 8 (Acher, Chauvet, &  
108 Chauvet, 1970). Mesotocin seems to be a functional homologue to oxytocin in birds because  
109 its administration increases preferences for larger over smaller social groups (Goodson,  
110 Schrock, Klatt, Kabelik, & Kingsbury, 2009) and increases prosocial preferences (Duque,  
111 Leichner, Ahmann, & Stevens, 2018), whereas administering an antagonist disrupts pair

112 bond formation (Pedersen & Tomaszycki, 2012). Therefore, we aimed to assess mesotocin's  
113 role in social bond formation and maintenance in birds.

114 Our first research question investigated whether mesotocin is critical to the formation  
115 of social bonds among unrelated, same-sex pinyon jays. We tested this by administering  
116 mesotocin, an oxytocin antagonist, or saline to previously unfamiliar pairs of individuals in  
117 repeated interactions. The short-term effects of this hormone on social bonds were assessed  
118 by measuring the proximity between individuals and comparing these distances across  
119 hormone conditions. If mesotocin builds social bonds, repeated exposure to mesotocin when  
120 paired with a particular individual should create a strong bond as measured by proximity.  
121 Exposure to oxytocin antagonist or saline should produce weaker or no bonds.

122 Our second research question investigated whether mesotocin provides long-term social  
123 bond maintenance in a group. We tested this by placing the pairs in larger groups in the  
124 absence of further hormone administration and measuring proximity between all group  
125 members. If mesotocin enhances the initial formation of a relationship between two  
126 individuals, then those bonds should remain when multiple individuals are present in a  
127 group, even without further mesotocin administration. Conversely, pairs treated with either  
128 oxytocin antagonist or saline should show less social proximity in the group setting.

## 129 **Methods**

### 130 **Subjects**

131 We conducted two experiments with independent sets of adult pinyon jays: 12 birds (8  
132 male, 4 female) in Experiment 1 from September to December 2015 and 24 birds (16 male, 8  
133 female) in Experiment 2 from September to December 2017. Researchers captured all birds  
134 in either Arizona or California (USFW permit MB694205) between 1996 and 2011. All birds  
135 were housed in individual cages at 22° C in one of three rooms with a 14:10 h light:dark

136 cycle and were fed Lafeber's Cockatiel and Parrot Pellets, turkey starter, live mealworms,  
137 pine nuts, and peanuts daily. The University of Nebraska-Lincoln IACUC approved this  
138 project (protocols 834 and 1354) and all procedures conformed to the ASAB/ABS Guidelines  
139 for the Use of Animals in Research.

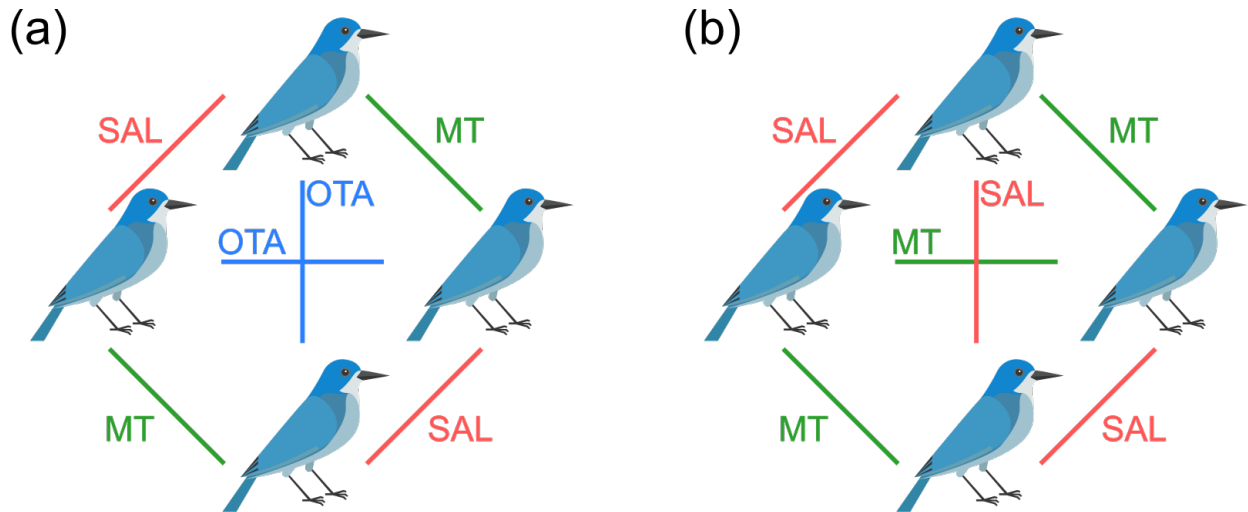

Figure 1. Schematic of pair formation and hormone conditions. Pinyon jays were repeatedly paired with every other bird from the same squad. We assigned every pair to a hormone condition: (a) Experiment 1 pairs received saline (SAL), mesotocin (MT), or oxytocin antagonist (OTA); (b) Experiment 2 pairs received SAL or MT.

#### 140 Formation of squads and pairs

141 We assigned each bird to a same-sex squad of four individuals (three squads in  
142 Experiment 1 and six squads in Experiment 2). During pair-formation phase sessions, we  
143 paired each individual in a squad with every other individual in the same squad  
144 (round-robin, six pairs per each squad); therefore, every bird had repeated experience with  
145 the three other birds in its squad (see Figure 1). To distinguish individuals visually, we  
146 placed a colored leg band (red, white, blue, or green) on each member of a squad. All birds  
147 were individually housed when not being run through experimental sessions, thus birds only  
148 had direct experience with squad members during experimental sessions.

149        Within a squad, we assigned each pair a hormone treatment consisting of either saline  
150 (SAL), mesotocin (MT), or oxytocin antagonist (OTA; only Experiment 1). Every pair  
151 always received the same hormone treatment throughout the duration of the experiment.  
152 Because each bird was in three pairs, each bird experienced each hormone condition, albeit  
153 with different partners. In Experiment 1, each individual was assigned one pair for each of  
154 the three conditions. In Experiment 2, we simplified the hormonal manipulations by  
155 removing the oxytocin antagonist condition, which resulted in each individual involved in  
156 either two mesotocin and one saline pairs or one mesotocin and two saline pairs.

### 157 **Hormone preparation and administration**

158        We diluted mesotocin (Bachem H2505, Torrance, CA) and oxytocin antagonist (R&D  
159 Systems L-368,899, Inc., Minneapolis, MN) to the necessary dose with sterile saline,  
160 separated each solution (including the saline control) into individual doses by pipetting 120  
161 microliters into individual microtubes, then froze all samples at -20° C. To ensure  
162 experimenters were blind to what hormone corresponded to which condition, we coded all  
163 samples as A, B, or C. Doses were calculated per 100 microliters and the additional 20  
164 microliters accounted for any potential spillage. For Experiment 1, the mesotocin dose was  
165 50 micrograms (approximately 24 IU) and oxytocin antagonist was 10 micrograms (based on  
166 Smith, Ågmo, Birnie, & French, 2010). Though unclear if related to the mesotocin  
167 administration, we observed some unintended side effects during Experiment 1 (e.g.,  
168 motor-balance irregularities). Further, Duque, Lechner, Ahmann, and Stevens (2018) found  
169 a behavioral influence of mesotocin administration using a lower dose, at 30 micrograms per  
170 100 microliters (approximately 14 IU). For these reasons, we reduced the mesotocin dose to  
171 30 micrograms in Experiment 2. To administer a dose, an experimenter used a needle-less  
172 syringe to drip the respective solution into the birds' nostrils. Handling and administration  
173 lasted approximately 10-15 seconds per bird.



174 **Procedure**

175 We sought to manipulate the formation of social bonds by repeatedly pairing birds  
176 following exposure to a specific hormone manipulation. Both experiments consisted of three  
177 phases: habituation to the testing environment and procedure, a pair-formation phase with  
178 repeated sessions of hormone/saline administration for all pairs, and a pair-maintenance  
179 phase with repeated sessions of no administration and all four birds together in a group.  
180 Prior to each pair-formation phase session, we administered to each member of a pair its  
181 assigned hormone condition (10 sessions for each pair), and all pairs within a squad were  
182 cycled through once before repeating any pairs.

183 **Habituation.** For habituation sessions, an experimenter transported an individual  
184 bird from its home cage to an experimental cage (minimum of 42 × 42 × 60 cm) that had a  
185 cup containing the birds' typical diet. The experimental cage was in another room that was  
186 visually isolated from other birds and was the same cage that would later be used during the  
187 pair phase. Each habituation session lasted approximately 15 minutes, and birds were given  
188 one session daily for nine weekdays. Thus, birds were familiarized to the testing environment  
189 prior to beginning the experimental phases.

190 **Pair-formation phase.** Pair-formation phase sessions were similar to habituation,  
191 except that birds were run in pairs for 45 minutes, and both birds were intranasally  
192 administered their preassigned solution immediately prior to being placed in the  
193 experimental cage. Specifically, after transporting both birds to the testing room, the  
194 experimenter dripped 120 microliters of solution into the birds' nares, placed both birds in  
195 the cage, and immediately exited the room.

196 We tested each bird only once per day; therefore, a minimum of six days elapsed before  
197 the same pair was repeated (since there are six pairs per squad), and we randomized the  
198 order of pairs within each block. Each bird experienced 10 sessions for each of its three pairs,

199 totaling 30 sessions. Unlike habituation, we did not introduce food at the beginning of pair  
200 phase sessions. However, halfway through Experiment 1 (pair phase sessions 6-10), we  
201 introduced a food bowl after 30 minutes to promote interactions between the pair. We  
202 discontinued this for Experiment 2 since we observed increased variability in the data  
203 following the introduction of food.

204 **Pair-maintenance phase.** Upon the completion of all pair-formation sessions, we  
205 tested each squad in 10 30-minute pair-maintenance phase sessions. In these sessions, we did  
206 not administer any solutions, and all four individuals were placed together in a larger cage  
207 ( $66 \times 74 \times 115$  cm). For Experiment 1 only, experimenters introduced two food bowls at the  
208 15-minute mark. We did not introduce any food during Experiment 2 group sessions.

### 209 **Quantifying pair proximity**

210 We video recorded all sessions to measure the distance between the pairs. Coders used  
211 Meazure (version 2.0.1, C Thing Software, <http://www.ething.com/Meazure.asp>) to capture  
212 the coordinates of each bird. Specifically, starting at the 15 s mark and every minute  
213 thereafter, we recorded the location of the top-center of each bird's head, then used those  
214 coordinates to calculate the distance between birds for each minute of that session. To  
215 account for differences in video size or the camera's distance from cage, the first recorded  
216 point for each session was a fixed, known distance (a horizontal cage bar) which was used to  
217 calibrate all following distances for that specific session.

218 After visualizing and analyzing a subset of Experiment 1 data, we determined that  
219 pairs' mean proximity had stabilized within the first 25 min of each pair session and overall  
220 results did not differ between when we analyzed all time points or merely the first 25. Thus,  
221 to avoid the increased variability induced by human disturbance and the introduction of  
222 food, we only used data from the first 25 min for pair-formation phase sessions. For

223 Experiment 1 pair-maintenance phase sessions, we omitted the proximity data for the minute  
224 before, during, and after the experimenter entered the room. Similarly, coders recorded a  
225 null measurement whenever the location of a bird's head was not visible or was unreliable,  
226 e.g., when a bird was in mid-flight. All data were scored by one of six coders and, prior to  
227 independently coding any sessions, each coder was extensively trained until they reached  
228 high reliability. Further, to quantify measurement differences between coders, all six coders  
229 scored the same 45 videos. These data were then used to calculate the intraclass correlation  
230 (ICC) as a measure of inter-rater reliability (Koo & Li, 2016). In an empty, random intercept  
231 model, 97.82% [95% CI: 96.44, 98.54] of the variation in pair proximity is accounted for by  
232 differences between different videos, suggesting that the different coders shared excellent  
233 agreement in quantifying proximities from the same video. We randomly selected one coder's  
234 data for each of the videos for our data analysis.

## 235 **Data analysis**

236 We analyzed the data using R (Version 3.5.3; R Core Team, 2019). Data, R code, and  
237 supplementary figures are available in the Supplementary Materials and at the Open Science  
238 Framework (<https://osf.io/67ncp/>). The manuscript was created using *rmarkdown* (Version  
239 1.12; Allaire, Xie, McPherson, Luraschi, Ushey, Atkins, Wickham, Cheng, Chang, & Iannone,  
240 2018) and *knitr* (Version 1.22; Xie, 2015), and the reproducible research materials are  
241 available from author JRS and at <https://osf.io/67ncp/>.

242 **Model selection.** We ran separate analyses of pair proximity for each phase for  
243 both experiments (four total datasets), using backward model selection to first find the  
244 best-fitting random effect structure, then tested various fixed effects to find the best-fitting  
245 model. For each analysis, we started with the full random effect structure including pair,  
246 squad, and a random slope for pairs across sessions (i.e., allowing pairs to change  
247 independently over time). We sequentially eliminated the weakest, non-significant effects,

248 then ran a nested model comparison (likelihood ratio test) to select the best-fitting random  
249 effect structure. A full fixed effect model was then constructed by adding condition (Exp. 1:  
250 SAL/MT/OTA; Exp. 2: SAL/MT), session (1-10; centered at final session), their interaction,  
251 and the quadratic effect of session. The final best-fitting model was then selected by  
252 sequential deletion and model comparison as detailed above. The significance of terms in all  
253 final models was confirmed by Wald tests and non-0 overlapping confidence intervals.

254 We also calculated Bayes factors (BF) to compare the weight of evidence for  
255 alternative models relative to the null (Wagenmakers, 2007). Specifically, we compared each  
256 model containing fixed effects to the best-fitting random effect model. We calculated Bayes  
257 factors by converting each model's Bayesian Information Criterion (BIC) using  $BF =$   
258  $e^{(BIC_{null} - BIC_{alternative})/2}$  (Wagenmakers, 2007).

## 259 Results

### 260 Pair-formation phase

261 In the pair-formation phase of Experiment 1, we measured the pair proximity for each  
262 session and condition. The best-fitting random effect structure included a random intercept  
263 for each unique pair and a random slope over sessions; i.e., allowing pairs to change  
264 independently over time (random intercept model for pair with versus without random slope:  
265  $\chi^2(2) = 18.53$ ,  $p < 0.001$ ). However, a random intercept for each squad was not warranted  
266 (full versus model without squad:  $\chi^2(1) = 2.85$ ,  $p = 0.09$ ). Inclusion of condition, session,  
267 their interaction, or quadratic effect of session did not improve an empty model (same  
268 random effects with no fixed effects, BFs  $< 0.01$ ). Thus, hormone treatment did not  
269 influence pair proximity (Figure 2a).

270 In Experiment 2, the best-fitting random effect structure included a random intercept  
271 for each unique pair and a random slope over sessions (random intercept model for pair with

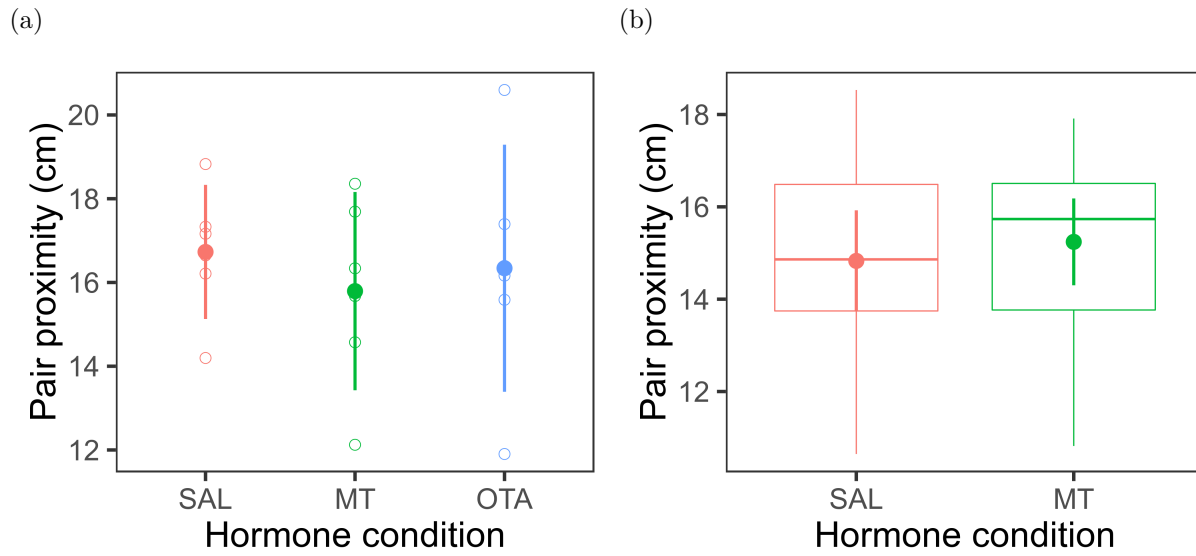

Figure 2. Pair-formation phase pair proximities for each condition for (a) Experiment 1 (6 pairs) and (b) Experiment 2 (12 pairs). Open circles represent individual pairs, horizontal bars represent medians, boxes represent interquartile ranges, whiskers represent full range, closed circles represent means, and error bars represent between-pair confidence intervals. SAL = saline, MT = mesotocin, and OTA = oxytocin antagonist.

272 versus without random slope:  $\chi^2(2) = 22.31$ ,  $p < 0.001$ ). However, a random intercept for  
273 each squad was not warranted (overfit full model versus model without squad:  $\chi^2(1) = 0.00$ ,  
274  $p > .99$ ). Both linear and quadratic fixed effects of session were warranted (model including  
275 linear with versus without quadratic session:  $\chi^2(1) = 8.16$ ,  $p = 0.004$ , indicating that pairs  
276 perched  $0.37 \pm 0.12$  cm (mean  $\pm$  standard error) closer each subsequent session, but the  
277 decrease in distance diminished by  $0.04 \pm 0.01$  cm each session (Figure S1). That is, though  
278 pairs perched more closely over time, the reduction in distance was less pronounced as time  
279 progressed. The Bayesian analysis, however, found evidence for no session effect ( $BF = 0.27$ ).  
280 Lastly, inclusion of condition was not warranted ( $\chi^2(1) = 0.35$ ,  $p = 0.55$ ; Figure 2b).

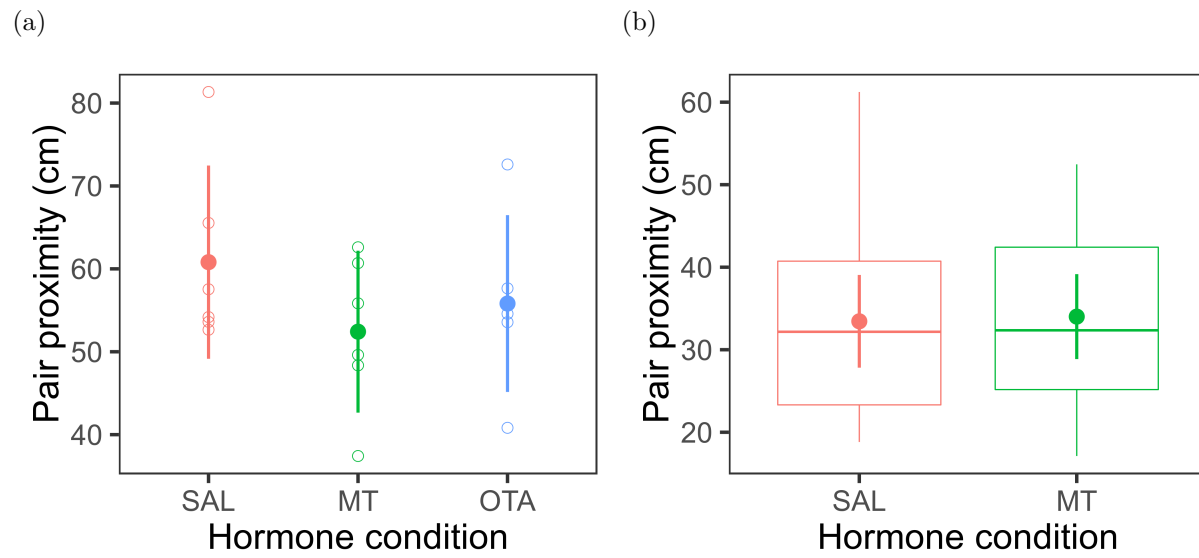

Figure 3. Pair-maintenance phase pair proximities for each condition for (a) Experiment 1 (6 pairs) and (b) Experiment 2 (12 pairs). Open circles represent individual pairs, horizontal bars represent medians, boxes represent interquartile ranges, whiskers represent full range, closed circles represent means, and error bars represent between-pair confidence intervals. SAL = saline, MT = mesotocin, and OTA = oxytocin antagonist.

### 281 Pair-maintenance phase

282 In the pair-maintenance phase of Experiment 1, the best-fitting random effect structure  
283 included only a random intercept for each unique pair (against null model with no random  
284 effects;  $\chi^2(1) = 5.05$ ,  $p = 0.025$ ). A linear fixed effect of session was warranted (against  
285 empty model;  $\chi^2(1) = 6.12$ ,  $p = 0.013$ ), indicating that pairs perched  $1.40 \pm 0.56$  cm closer  
286 in each subsequent session (Figure S2). The Bayesian analysis, however, did not find  
287 evidence for a session effect (BF = 1.59). No other fixed effects tested (condition or  
288 quadratic effect of session) were warranted (Figure 3a).

289 In Experiment 2, the best-fitting random effect structure included a random intercept  
290 for each unique pair and group but not a random slope (full model with versus without

291 random slope:  $\chi^2(1) = 5.62$ ,  $p = 0.018$ ). Inclusion of condition, session, their interaction, or  
292 quadratic effect of session did not significantly improve an empty model (same random  
293 effects with no fixed effects, BFs  $< 0.09$ ; Figure S2). Thus, hormone condition was not  
294 warranted in the best-fitting model (Figure 3b).

295

## Discussion

296 Our analysis of same-sex pinyon jay pairs showed no influence of mesotocin or oxytocin  
297 antagonist administration on the proximity of paired birds. Although there was a small  
298 effect of session in some models, hormone condition did not influence the proximity of birds  
299 for the pair-formation phase or the pair-maintenance phase.

300 Oxytocin has been implicated in a wide range of social behaviors in mammals (Insel &  
301 Young, 2000; Donaldson & Young, 2008), as has isotocin, the oxytocin homologue found in  
302 fish (Godwin & Thompson, 2012; Reddon, O'Connor, Marsh-Rollo, Balshine, Gozdowska, &  
303 Kulczykowska, 2015) and mesotocin in reptiles (Kabelik & Magruder, 2014). Mesotocin also  
304 plays a role in avian maternal care (Chokchaloemwong, Prakobsaeng, Sartsoongnoen,  
305 Kosonsiriluk, El Halawani, & Chaiseha, 2013), mating pair bond formation (Pedersen &  
306 Tomaszycski, 2012; Klatt & Goodson, 2013), flocking behavior (Goodson, Schrock, Klatt,  
307 Kabelik, & Kingsbury, 2009), and prosociality (Duque, Leichner, Ahmann, & Stevens, 2018).  
308 Here, we do not demonstrate evidence that mesotocin shapes social bond formation or  
309 maintenance in pinyon jays, raising the possibility that mesotocin may function differently  
310 than oxytocin. That is, social bonding could be affected differently by mesotocin compared  
311 to oxytocin. Though we do not show an effect of mesotocin on bonding in our study, we do  
312 not believe that it provides strong evidence against the possibility of mesotocin regulating  
313 social bonds in birds for a number of reasons.

314

Many of the functions of the oxytocin family of peptides are quite evolutionarily

315 conserved, from fish and reptiles to chimpanzees and humans. Though it is possible that  
316 functionality may occur in the other species and not birds, this seems unlikely. However, few  
317 studies have directly investigated the role of oxytocin-family hormone on social bonds  
318 outside of the mating and parenting context. Chimpanzees have higher levels of urinary  
319 oxytocin following grooming bouts with socially bonded partners compared to non-bonded  
320 grooming partners (Crockford, Wittig, Langergraber, Ziegler, Zuberbühler, & Deschner,  
321 2013; Wittig, Crockford, Deschner, Langergraber, Ziegler, & Zuberbühler, 2014). Yet, this is  
322 correlational and only focused on bond maintenance not formation. Administering oxytocin  
323 to dogs increases affiliative behaviors to other dogs and humans, but it does not influence  
324 spatial proximity and these effects are acute and not long lasting enough to qualify as social  
325 bonding (Romero, Nagasawa, Mogi, Hasegawa, & Kikusui, 2014). Female meadow voles do  
326 show stronger preferences for familiar partners over unfamiliar partners after oxytocin  
327 administration compared to saline, but this effect was measured after only 24 hours (Beery  
328 & Zucker, 2010). Though administering oxytocin or mesotocin influences the formation of  
329 mating pair bonds (Witt, Carter, & Walton, 1990; Insel & Hulihan, 1995; Pedersen &  
330 Tomaszycski, 2012), we do not have strong evidence of these hormones directly shaping  
331 formation of same-sex social bonds over time. So it is possible that oxytocin-family  
332 hormones facilitate same-sex social bond maintenance but not formation.

333 It is also possible that mesotocin does facilitate social bond formation, but we simply  
334 did not detect it. Though social proximity is generally a good indicator of relationship  
335 quality (Croft, Krause, & James, 2008), it may not be a good indicator of the social impact  
336 mesotocin has on pinyon jays. It is also possible that behaviors other than proximity are  
337 better indicators of social bonds. For pinyon jay mating pairs, proximity is a clear indicator  
338 of a pair bond, along with additional behaviors such as begging, allopreening, food sharing,  
339 and coordinated displays and calls (Marzluff & Balda, 1992). Though we recorded a few  
340 instances of begging, allopreening, aggression, and even mounting, we did not notice any  
341 consistent changes in other behaviors, but a more detailed analysis of more subtle behaviors



342 may reveal differences across hormonal conditions. Thus, it is possible our manipulations  
343 impacted birds in ways not captured by our measures and study design.

344 Additionally, insufficient dosage or sub-optimal timing of the dosage may have  
345 interfered with the establishment of the social bonds. We used dosages based on our  
346 previous study showing acute effects of mesotocin on prosocial food sharing (Duque,  
347 Leichner, Ahmann, & Stevens, 2018). However, it is possible that different dosages are  
348 required to induce the longer-term effects on social bonds. It is also possible that the  
349 immediate time course of administration and behavioral testing did not match that needed  
350 to establish the bonds. In our design, birds received one hormone dose and were placed  
351 together in a cage for 45 minutes. For a given pair, this occurred roughly every six days.  
352 Thus, the duration and frequency of social interactions experienced in the lab likely differ  
353 from those needed to form new bonds in the wild. Finally, each pair experienced ten sessions  
354 with each partner. Some of the statistical models showed effects of sessions on proximity,  
355 with pairs getting closer over time. Though they did not differ across hormone treatment, it  
356 is possible that we did not give the bonds enough time to form, and additional treatments  
357 and sessions are needed to build the bonds.

358 While we chose to investigate the effects of mesotocin, it is plausible that other  
359 hormones may play a stronger role in avian social bonding. For instance, both  
360 administration of vasotocin (the avian homologue of the mammalian arginine vasopressin) as  
361 well as neural vasotocin activity is related to gregariousness in zebra finch, but the effect is  
362 most evident in males (Goodson, Lindberg, & Johnson, 2004; Goodson, Schrock, Klatt,  
363 Kabelik, & Kingsbury, 2009). Importantly, vasotocin promoted a preference for a larger flock  
364 size in male zebra finch, but did not impact the amount of time spent in close proximity  
365 (Kelly, Kingsbury, Hoffbuhr, Schrock, Waxman, Kabelik, Thompson, & Goodson, 2011).  
366 Thus, the role of vasotocin in pinyon jay social behavior warrants investigation. Further, low  
367 sample size prevents our testing of sex differences, but it is possible that mesotocin or

368 vasotocin impacts the sexes differently.

369         Lastly, the level of circulating hormones is only one way in which hormones might  
370 regulate social bond formation. It is unclear how measurements and administration of  
371 oxytocin-family hormones outside of the brain relate to levels in the brain (McCullough,  
372 Churchland, & Mendez, 2013; Evans, Dal Monte, Noble, & Averbeck, 2014), particularly in  
373 corvids, among which relatively little mesotocin research has been conducted (Duque,  
374 Leichner, Ahmann, & Stevens, 2018). Nevertheless, there is evidence in other species of  
375 peripheral levels correlating with social behavior (Crockford, Wittig, Langergraber, Ziegler,  
376 Zuberbühler, & Deschner, 2013; Wittig, Crockford, Deschner, Langergraber, Ziegler, &  
377 Zuberbühler, 2014) and peripheral administration influencing social behavior (Smith, Ågmo,  
378 Birnie, & French, 2010; Romero, Nagasawa, Mogi, Hasegawa, & Kikusui, 2014). Yet,  
379 individuals also vary in their underlying sensitivity to those hormones, primarily determined  
380 by the number and distribution of the receptors to which those hormones bind. For example,  
381 differences in the density of oxytocin/vasopressin neurons in the brain underlie whether a  
382 prairie vole will form a monogamous bond with its partner, or be polygamous (Insel,  
383 Winslow, Wang, & Young, 1998). Thus, it would be highly informative to analyze the  
384 localization of mesotocin receptors across the pinyon jay brain to shed light on what makes  
385 this particular species remarkably social, as compared to even its closest sister species  
386 (Marzluff & Balda, 1992).

387         Here, we find that administration of mesotocin or oxytocin antagonist did not impact  
388 how closely two previously unfamiliar birds perched next to one another. However, future  
389 investigations are warranted to clarify whether mesotocin influences (1) other forms of  
390 behaviors during bond formation and the time course of those effects, (2) the relationship  
391 between administered mesotocin and circulating levels in the brain, (3) the role of related  
392 hormones (e.g., vasotocin), and (4) the role of mesotocin on social behaviors in other corvid  
393 species. Given the variation in levels of sociality and cooperation across corvids, exploring

394 the hormonal and neural underpinning of these behaviors could provide valuable insights into  
395 the evolution and mechanisms of social behavior.

396

### Acknowledgments

397 This research was supported, in part, by a Nebraska EPSCoR FIRST Award and a  
398 University of Nebraska-Lincoln Layman Award to J.R.S. and a National Science Foundation  
399 Graduate Research Fellowship Program award (DGE-10410000) to J.F.D.

400 We would like to thank the undergraduate research assistants Megan Bosworth, Allie  
401 Cruikshank, Gage Grutz, Marisa Howell, Gretchen Lusso, Maddie Mathias, and Elise Thayer  
402 for collecting the data, laboratory technician Jesse Baumann for maintaining the bird colony,  
403 and Jeffrey French and Aaryn Mustoe for advice on mesotocin administration.

References

404

405 Acher, R., Chauvet, J., & Chauvet, M.-T. (1970). Phylogeny of the neurohypophysial  
406 hormones. *European Journal of Biochemistry*, *17*(3), 509–513.  
407 doi:10.1111/j.1432-1033.1970.tb01193.x.

408 Allaire, J., Xie, Y., McPherson, J., Luraschi, J., Ushey, K., Atkins, A., Wickham, H., Cheng,  
409 J., Chang, W., & Iannone, R. (2018). *rmarkdown: Dynamic documents for R*.  
410 <https://rmarkdown.rstudio.com>.

411 Bartz, J. A., Zaki, J., Bolger, N., & Ochsner, K. N. (2011). Social effects of oxytocin in  
412 humans: Context and person matter. *Trends in Cognitive Sciences*, *15*(7), 301–309.  
413 doi:10.1016/j.tics.2011.05.002.

414 Baumgartner, T., Heinrichs, M., Vonlanthen, A., Fischbacher, U., & Fehr, E. (2008).  
415 Oxytocin shapes the neural circuitry of trust and trust adaptation in humans.  
416 *Neuron*, *58*(4), 639–650. doi:10.1016/j.neuron.2008.04.009.

417 Beery, A. K., & Zucker, I. (2010). Oxytocin and same-sex social behavior in female meadow  
418 voles. *Neuroscience*, *169*(2), 665–673. doi:10.1016/j.neuroscience.2010.05.023.

419 Benítez, M. E., Sosnowski, M. J., Tomeo, O. B., & Brosnan, S. F. (2018). Urinary oxytocin  
420 in capuchin monkeys: Validation and the influence of social behavior. *American*  
421 *Journal of Primatology*, *80*(10), e22877. doi:10.1002/ajp.22877.

422 Broad, K., Curley, J., & Keverne, E. (2006). Mother–infant bonding and the evolution of  
423 mammalian social relationships. *Philosophical Transactions of the Royal Society B:*  
424 *Biological Sciences*, *361*(1476), 2199–2214. doi:10.1098/rstb.2006.1940.

425 Brosnan, S. F., Talbot, C. F., Essler, J. L., Leverett, K., Flemming, T., Dougall, P., Heyler,  
426 C., & Zak, P. J. (2015). Oxytocin reduces food sharing in capuchin monkeys by

- 427 modulating social distance. *Behaviour*, 152(7–8), 941–961.  
428 doi:10.1163/1568539X-00003268.
- 429 Cameron, E. Z., Setsaas, T. H., & Linklater, W. L. (2009). Social bonds between unrelated  
430 females increase reproductive success in feral horses. *Proceedings of the National  
431 Academy of Sciences USA*, 106(33), 13850–13853. doi:10.1073/pnas.0900639106.
- 432 Cavanaugh, J., Mustoe, A. C., Taylor, J. H., & French, J. A. (2014). Oxytocin facilitates  
433 fidelity in well-established marmoset pairs by reducing sociosexual behavior toward  
434 opposite-sex strangers. *Psychoneuroendocrinology*, 49, 1–10.  
435 doi:10.1016/j.psyneuen.2014.06.020.
- 436 Chokchaloemwong, D., Prakobsaeng, N., Sartsoongnoen, N., Kosonsiriluk, S., El Halawani,  
437 M., & Chaiseha, Y. (2013). Mesotocin and maternal care of chicks in native Thai  
438 hens (*Gallus domesticus*). *Hormones and Behavior*, 64(1), 53–69.  
439 doi:10.1016/j.yhbeh.2013.04.010.
- 440 Clutton-Brock, T. (2016). *Mammal societies*. New York: John Wiley & Sons.
- 441 Costa, A. P. C. D., Guevara-Guzman, R. G., Ohkura, S., Goode, J. A., & Kendrick, K. M.  
442 (1996). The role of oxytocin release in the paraventricular nucleus in the control of  
443 maternal behaviour in the sheep. *Journal of Neuroendocrinology*, 8(3), 163–177.  
444 doi:10.1046/j.1365-2826.1996.04411.x.
- 445 Crockford, C., Wittig, R. M., Langergraber, K., Ziegler, T. E., Zuberbühler, K., & Deschner,  
446 T. (2013). Urinary oxytocin and social bonding in related and unrelated wild  
447 chimpanzees. *Proceedings of the Royal Society of London, Series B*, 280(1755),  
448 20122765. doi:10.1098/rspb.2012.2765.
- 449 Croft, D. B., Krause, J., & James, R. (2008). *Exploring animal social networks*. Princeton,

450 NJ: Princeton University Press.

451 Donaldson, Z. R., & Young, L. J. (2008). Oxytocin, vasopressin, and the neurogenetics of  
452 sociality. *Science*, *322*(5903), 900–904. doi:10.1126/science.1158668.

453 Duque, J. F., & Stevens, J. R. (2016). Voluntary food sharing in pinyon jays: The role of  
454 reciprocity and dominance. *Animal Behaviour*, *122*, 135–144.  
455 doi:10.1016/j.anbehav.2016.09.020.

456 Duque, J. F., Leichner, W., Ahmann, H., & Stevens, J. R. (2018). Mesotocin influences  
457 pinyon jay prosociality. *Biology Letters*, *14*(4), 20180105. doi:10.1098/rsbl.2018.0105.

458 Evans, S. L., Dal Monte, O., Noble, P., & Aeverbeck, B. B. (2014). Intranasal oxytocin effects  
459 on social cognition: A critique. *Brain Research*, *1580*, 69–77.  
460 doi:10.1016/j.brainres.2013.11.008.

461 Godwin, J., & Thompson, R. (2012). Nonapeptides and social behavior in fishes. *Hormones  
462 and Behavior*, *61*(3), 230–238. doi:10.1016/j.yhbeh.2011.12.016.

463 Goodson, J. L., Lindberg, L., & Johnson, P. (2004). Effects of central vasotocin and  
464 mesotocin manipulations on social behavior in male and female zebra finches.  
465 *Hormones and Behavior*, *45*(2), 136–143. doi:10.1016/j.yhbeh.2003.08.006.

466 Goodson, J. L., Schrock, S. E., Klatt, J. D., Kabelik, D., & Kingsbury, M. A. (2009).  
467 Mesotocin and nonapeptide receptors promote estrildid flocking behavior. *Science*,  
468 *325*(5942), 862–866. doi:10.1126/science.1174929.

469 Hrdy, S. B. (1999). *Mother nature: A history of mothers, infants, and natural selection*. New  
470 York: Pantheon.

471 Insel, T. R., & Hulihan, T. J. (1995). A gender-specific mechanism for pair bonding:  
472 Oxytocin and partner preference formation in monogamous voles. *Behavioral*

- 473 *Neuroscience*, 109(4), 782–789. doi:10.1037/0735-7044.109.4.782.
- 474 Insel, T. R., & Young, L. J. (2000). Neuropeptides and the evolution of social behavior.  
475 *Current Opinion in Neurobiology*, 10(6), 784–789.  
476 doi:10.1016/S0959-4388(00)00146-X.
- 477 Insel, T. R., Winslow, J. T., Wang, Z., & Young, L. J. (1998). Oxytocin, vasopressin, and  
478 the neuroendocrine basis of pair bond formation. In H. H. Zingg, C. W. Bourque, &  
479 D. G. Bichet (Eds.), *Vasopressin and oxytocin: Molecular, cellular, and clinical*  
480 *advances* (pp. 215–224). Boston, MA: Springer. doi:10.1007/978-1-4615-4871-3\_28.
- 481 Kabelik, D., & Magruder, D. (2014). Involvement of different mesotocin (oxytocin  
482 homologue) populations in sexual and aggressive behaviours of the brown anole.  
483 *Biology Letters*, 10(8), 20140566. doi:10.1098/rsbl.2014.0566.
- 484 Kelly, A. M., Kingsbury, M. A., Hoffbuhr, K., Schrock, S. E., Waxman, B., Kabelik, D.,  
485 Thompson, R. R., & Goodson, J. L. (2011). Vasotocin neurons and septal V1a-like  
486 receptors potently modulate songbird flocking and responses to novelty. *Hormones*  
487 *and Behavior*, 60(1), 12–21. doi:10.1016/j.yhbeh.2011.01.012.
- 488 Klatt, J. D., & Goodson, J. L. (2013). Oxytocin-like receptors mediate pair bonding in a  
489 socially monogamous songbird. *Proceedings of the Royal Society of London, Series B*,  
490 280(1750), 20122396. doi:10.1098/rspb.2012.2396.
- 491 Koo, T. K., & Li, M. Y. (2016). A guideline of selecting and reporting intraclass correlation  
492 coefficients for reliability research. *Journal of Chiropractic Medicine*, 15(2), 155–163.  
493 doi:10.1016/j.jcm.2016.02.012.
- 494 Kosfeld, M., Heinrichs, M., Zak, P. J., Fischbacher, U., & Fehr, E. (2005). Oxytocin

- 495 increases trust in humans. *Nature*, *435*(7042), 673–676.
- 496 Marzluff, J. M., & Balda, R. P. (1992). *The pinyon jay: Behavioral ecology of a colonial and*  
497 *cooperative corvid*. London: A&C Black.
- 498 McCullough, M. E., Churchland, P. S., & Mendez, A. J. (2013). Problems with measuring  
499 peripheral oxytocin: Can the data on oxytocin and human behavior be trusted?  
500 *Neuroscience & Biobehavioral Reviews*, *37*(8), 1485–1492.  
501 doi:10.1016/j.neubiorev.2013.04.018.
- 502 Nagasawa, M., Mitsui, S., En, S., Ohtani, N., Ohta, M., Sakuma, Y., Onaka, T., Mogi, K., &  
503 Kikusui, T. (2015). Oxytocin-gaze positive loop and the coevolution of human-dog  
504 bonds. *Science*, *348*(6232), 333–336. doi:10.1126/science.1261022.
- 505 Nagasawa, M., Okabe, S., Mogi, K., & Kikusui, T. (2012). Oxytocin and mutual  
506 communication in mother-infant bonding. *Frontiers in Human Neuroscience*, *6*, 31.  
507 doi:10.3389/fnhum.2012.00031.
- 508 Nave, G., Camerer, C., & McCullough, M. (2015). Does oxytocin increase trust in humans?  
509 A critical review of research. *Perspectives on Psychological Science*, *10*(6), 772–789.  
510 doi:10.1177/1745691615600138.
- 511 Pedersen, A., & Tomaszycycki, M. (2012). Oxytocin antagonist treatments alter the formation  
512 of pair relationships in zebra finches of both sexes. *Hormones and Behavior*, *62*(2),  
513 113–119. doi:10.1016/j.yhbeh.2012.05.009.
- 514 R Core Team. (2019). *R: A language and environment for statistical computing*. Vienna,  
515 Austria: R Foundation for Statistical Computing. <https://www.R-project.org/>.
- 516 Reddon, A. R., O'Connor, C. M., Marsh-Rollo, S. E., Balshine, S., Gozdowska, M., &  
517 Kulczykowska, E. (2015). Brain nonapeptide levels are related to social status and



518 affiliative behaviour in a cooperatively breeding cichlid fish. *Royal Society Open*  
519 *Science*, 2(2), 140072. doi:10.1098/rsos.140072.

520 Romero, T., Nagasawa, M., Mogi, K., Hasegawa, T., & Kikusui, T. (2014). Oxytocin  
521 promotes social bonding in dogs. *Proceedings of the National Academy of Sciences*  
522 *USA*, 111(25), 9085–9090. doi:10.1073/pnas.1322868111.

523 Silk, J. B. (2007). The adaptive value of sociality in mammalian groups. *Philosophical*  
524 *Transactions of the Royal Society of London, Series B*, 362, 539–559.

525 Silk, J. B., Alberts, S. C., & Altmann, J. (2003). Social bonds of female baboons enhance  
526 infant survival. *Science*, 302(5648), 1231–1234. doi:10.1126/science.1088580.

527 Silk, J. B., Beehner, J. C., Bergman, T. J., Crockford, C., Engh, A. L., Moscovice, L. R.,  
528 Wittig, R. M., Seyfarth, R. M., & Cheney, D. L. (2010). Strong and consistent social  
529 bonds enhance the longevity of female baboons. *Current Biology*, 20(15), 1359–1361.  
530 doi:10.1016/j.cub.2010.05.067.

531 Smith, A. S., Ågmo, A., Birnie, A. K., & French, J. A. (2010). Manipulation of the oxytocin  
532 system alters social behavior and attraction in pair-bonding primates, *Callithrix*  
533 *penicillata*. *Hormones and Behavior*, 57(2), 255–262.  
534 doi:10.1016/j.yhbeh.2009.12.004.

535 Wagenmakers, E.-J. (2007). A practical solution to the pervasive problems of *p* values.  
536 *Psychonomic Bulletin & Review*, 14(5), 779–804. doi:10.3758/BF03194105.

537 Witt, D. M., Carter, S. C., & Walton, D. M. (1990). Central and peripheral effects of  
538 oxytocin administration in prairie voles (*Microtus ochrogaster*). *Pharmacology*  
539 *Biochemistry and Behavior*, 37(1), 63–69. doi:10.1016/0091-3057(90)90042-G.

540 Wittig, R. M., Crockford, C., Deschner, T., Langergraber, K. E., Ziegler, T. E., &

- 541 Zuberbühler, K. (2014). Food sharing is linked to urinary oxytocin levels and bonding  
542 in related and unrelated wild chimpanzees. *Proceedings of the Royal Society of*  
543 *London, Series B*, 281(1778), 20133096. doi:10.1098/rspb.2013.3096.
- 544 Xie, Y. (2015). *Dynamic documents with R and knitr* (2nd ed.). Boca Raton, FL: CRC  
545 Press.
